# Supplementary material
Source: Springer Nature journal article supplement (https://www.springermedizin.de/resource/supplementary/12883_2012_704_MOESM2_ESM.pdf/9455742)
Supplement: MOESM2 [file 9455742]

415 women

28 Spontaneous abortions

2 Stillbirths

5 Voluntary abortions

386 Live births

37 pregnancies with  
follow-up < 1 year

349 pregnancies included in the study
